# Supplementary material for: The Impact of Mode of Birth on Childbirth-Related Post Traumatic Stress Symptoms beyond 6 Months Postpartum: An Integrative Review
Source: MDPI journal article supplement (doi:10.3390/ijerph19148830), 2022-07-20
Supplement: s1 [file s1]

**Supplementary Table S2:** Quality assessment of the included qualitative studies based on Critical Appraisal Skills Programme (CASP)  
Methodology

| Studies           | 1. Was there a clear statement of the aims of the research? | 2. Is a qualitative methodology appropriate? | 3. Was the research design appropriate to address the aims of the research? | 4. Are the study's theoretical underpinnings clear, consistent and conceptually coherent? | 5. Was the recruitment strategy appropriate to the aims of the research? | 6. Was the data collected in a way that addressed the research issue? | 7. Has the relationship between researcher and participants been adequately considered? | 8. Have ethical issues been taken into consideration? | 9. Was the analysis sufficiently rigorous? | 10. Is there a clear statement of findings? |
|-------------------|-------------------------------------------------------------|----------------------------------------------|-----------------------------------------------------------------------------|-------------------------------------------------------------------------------------------|--------------------------------------------------------------------------|-----------------------------------------------------------------------|-----------------------------------------------------------------------------------------|-------------------------------------------------------|--------------------------------------------|---------------------------------------------|
| Ayers et al. 2006 | Yes                                                         | Yes                                          | Yes                                                                         | Yes                                                                                       | Yes                                                                      | Yes                                                                   | Can't tell                                                                              | Yes                                                   | Yes                                        | Yes                                         |
| Beck et al., 2004 | Yes                                                         | Yes                                          | Yes                                                                         | Yes                                                                                       | Yes                                                                      | Yes                                                                   | Can't tell                                                                              | Yes                                                   | Yes                                        | Yes                                         |
