# Supplementary material for: The Impact of Mode of Birth on Childbirth-Related Post Traumatic Stress Symptoms beyond 6 Months Postpartum: An Integrative Review
Source: MDPI journal article supplement (doi:10.3390/ijerph19148830), 2022-07-20
Supplement: s1 [file s1]

**Supplementary Table S1: Tool used for the quality assessment of the cohort and cross-sectional studies, based on Critical Appraisal Skills Programme (CASP) checklist for cohort studies and cross-sectional studies by Barnett et al., 2012**

| 12-question checklist                                                                                                                                          | Criteria                                                                                                                                                                                                                | Reason for limitation for criteria                                                                                                                                                                                                                                                                                                                                                                                                                                                                                                                                               |
|----------------------------------------------------------------------------------------------------------------------------------------------------------------|-------------------------------------------------------------------------------------------------------------------------------------------------------------------------------------------------------------------------|----------------------------------------------------------------------------------------------------------------------------------------------------------------------------------------------------------------------------------------------------------------------------------------------------------------------------------------------------------------------------------------------------------------------------------------------------------------------------------------------------------------------------------------------------------------------------------|
| 1. Did the study address a clearly focused issue?                                                                                                              | Initial quality screening questions                                                                                                                                                                                     |                                                                                                                                                                                                                                                                                                                                                                                                                                                                                                                                                                                  |
| 2. Did the authors use an appropriate method to answer their question?                                                                                         |                                                                                                                                                                                                                         |                                                                                                                                                                                                                                                                                                                                                                                                                                                                                                                                                                                  |
| 3. Was the cohort recruited in an acceptable way?                                                                                                              | <b>Criterion 1: External validity</b><br>assessment of selection bias                                                                                                                                                   | Random sample (transparent, reflects target population, and nonresponse <30% and loss of follow-up <50% = Yes (1 point)<br>Nonrandom sample (not transparent, self-selecting, via Internet or ads) and/or nonresponse >30% and/or follow-up >50% = No (0 points)                                                                                                                                                                                                                                                                                                                 |
| 4. (a) Was the follow-up of the subjects complete enough?<br>(b) Was the follow-up of the subjects long enough?                                                |                                                                                                                                                                                                                         |                                                                                                                                                                                                                                                                                                                                                                                                                                                                                                                                                                                  |
| 5. Was the exposure (mode of birth) accurately measured to minimize bias?                                                                                      | <b>Criterion 2: Internal validity</b><br>assessment of measurement bias<br>(exposure: mode of birth)                                                                                                                    | Vaginal birth, operative vaginal birth, emergency caesarean section, elective caesarean section = Yes (1 point)<br>Self-reported after more than 6 weeks = No (0 points)                                                                                                                                                                                                                                                                                                                                                                                                         |
| 6. Was the outcome (CB-PTS/D) accurately measured to minimize bias?                                                                                            | <b>Criterion 3: Internal validity</b><br>assessment of measurement bias<br>(outcome: CB-PTS/D)                                                                                                                          | Validated questionnaire to assess symptoms, interview, diagnosed by a doctor = Yes (1 point)<br>Not-validated questionnaire, using the the word diagnosis 'PTSD' instead of symptoms of PTSD = No (0 points)                                                                                                                                                                                                                                                                                                                                                                     |
| 7. (a) Have the authors identified all important confounding factors?<br>(b) Have they taken account of the confounding factors in the design and/or analysis? | <b>Criterion 4: Internal validity</b><br>assessment of confounding                                                                                                                                                      | <u>Studies not calculating associations:</u><br>Characteristics or measures for previous trauma (e.g. sexual abuse) and mental health (e.g. depression, anxiety)<br>Yes = ( 1 point)<br>No characteristics or measures for previous trauma (e.g. sexual abuse) or mental health (e.g. depression, anxiety)<br>No = (0 points)<br><br><u>Studies calculating associations:</u><br>Adjusted for confounders: previous trauma (e.g. sexual abuse) and mental health (e.g. depression, anxiety) = Yes (1 points)<br>Adjusted for only one or none of the confounders = No (0 points) |
| 8. What are the results of this study?                                                                                                                         | Overall quality assessment of the results and transferability of the study findings (as determined by likelihood of selection bias (Criterion 1); measurement biases (Criteria 2 and 3); and confounding (Criterion 4). |                                                                                                                                                                                                                                                                                                                                                                                                                                                                                                                                                                                  |
| 9. How precise are the results?                                                                                                                                |                                                                                                                                                                                                                         |                                                                                                                                                                                                                                                                                                                                                                                                                                                                                                                                                                                  |
| 10. Do you believe the results?                                                                                                                                |                                                                                                                                                                                                                         |                                                                                                                                                                                                                                                                                                                                                                                                                                                                                                                                                                                  |

|                                                                     |                                             |  |
|---------------------------------------------------------------------|---------------------------------------------|--|
|                                                                     | No additional quality criterion was defined |  |
| 11. Can the results be applied to the local population?             |                                             |  |
| 12. Do the results of this study fit with other available evidence? |                                             |  |
